# Supplementary material
Source: MDPI journal article supplement (https://www.mdpi.com/2073-4344/13/3/578)
Supplement: s1 [file s1]

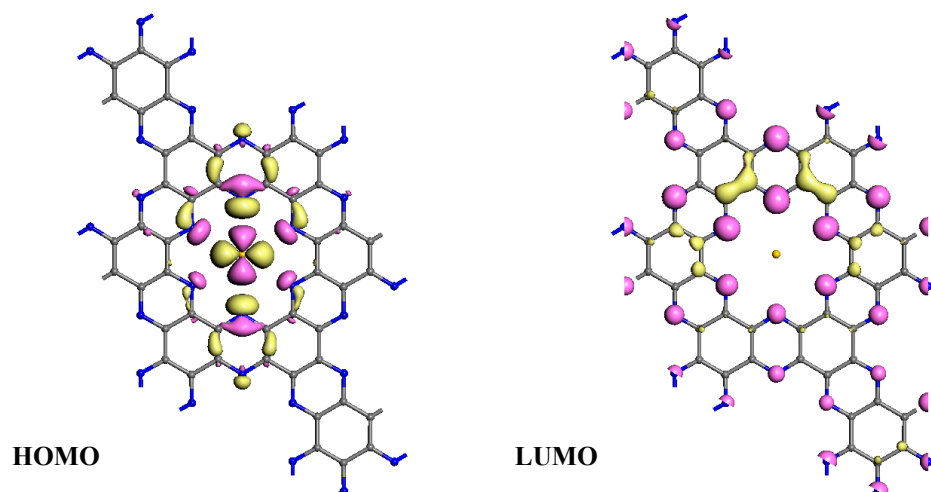

**Figure S1.** The schematic diagram of frontier molecular orbitals for catalyst Au/C<sub>2</sub>N. (The isovalue is setting as default 0.03 a.u.).

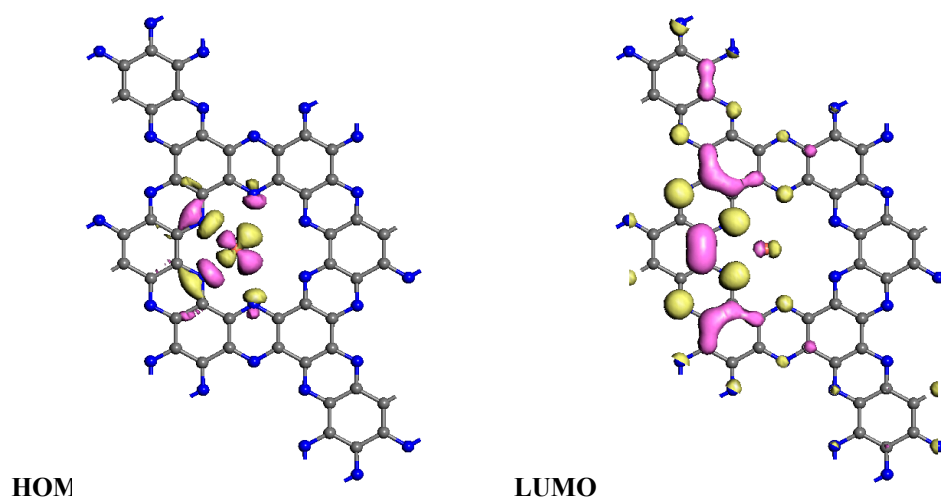

**Figure S2.** The schematic diagram of frontier molecular orbitals for catalyst Cu/C<sub>2</sub>N. (The isovalue is setting as default 0.03 a.u.).

### path I

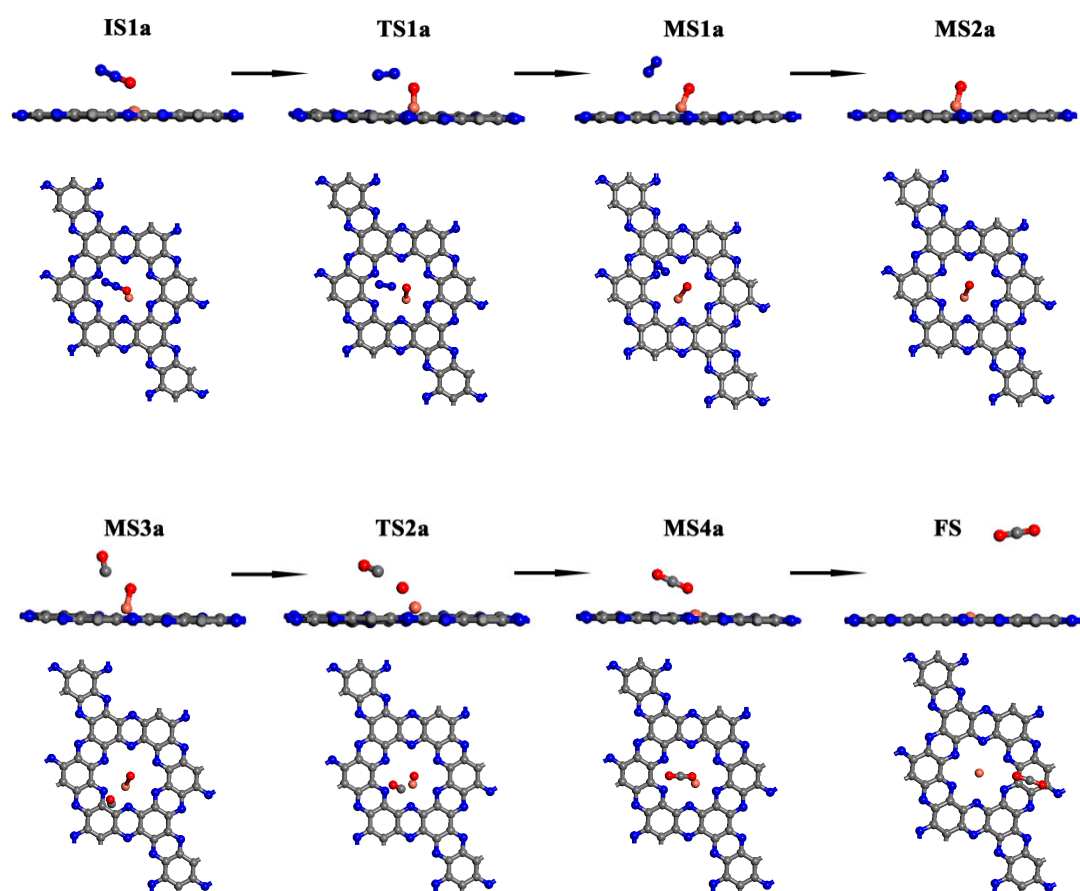

**Figure S3.** The schematic diagram of all species with the MEP for the N<sub>2</sub>O reduction on the Cu/C<sub>2</sub>N monolayer via mechanism I. (Blue, grey, orange and red balls represent N, C, Cu and O atoms, respectively.).

### path II

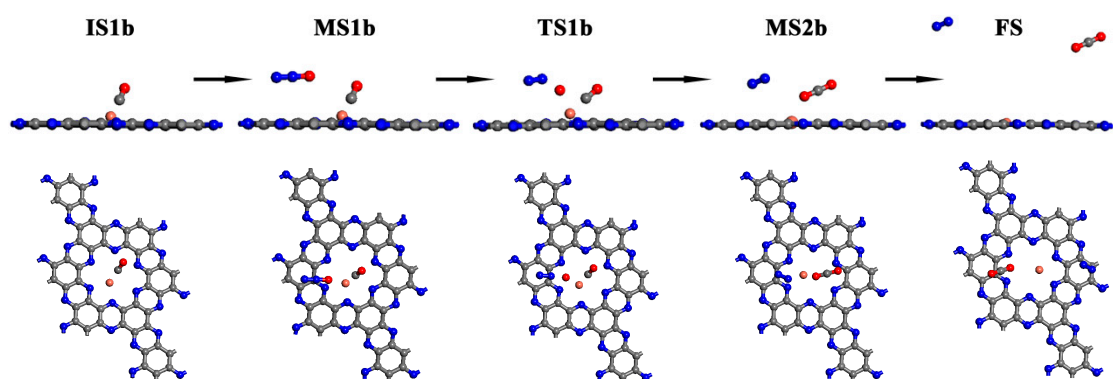

**Figure S4.** The schematic diagram of all species and the MEP for the N<sub>2</sub>O reduction on the Cu/C<sub>2</sub>N monolayer via mechanism II. (Blue, grey, orange and red balls represent N, C, Cu and O atoms, respectively.).

## HOMO charge density

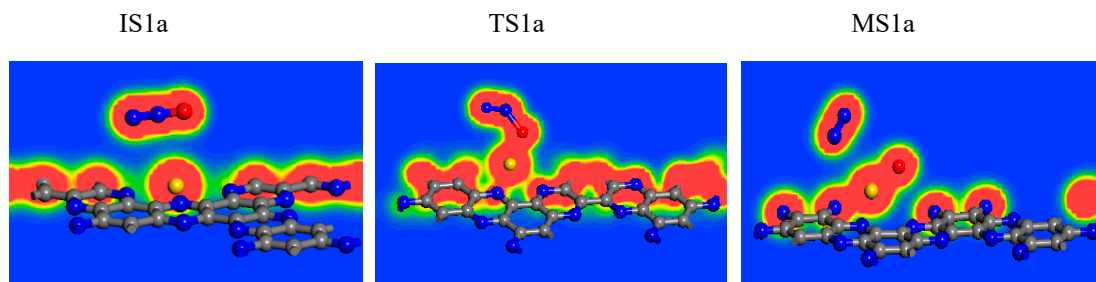

## LUMO charge density

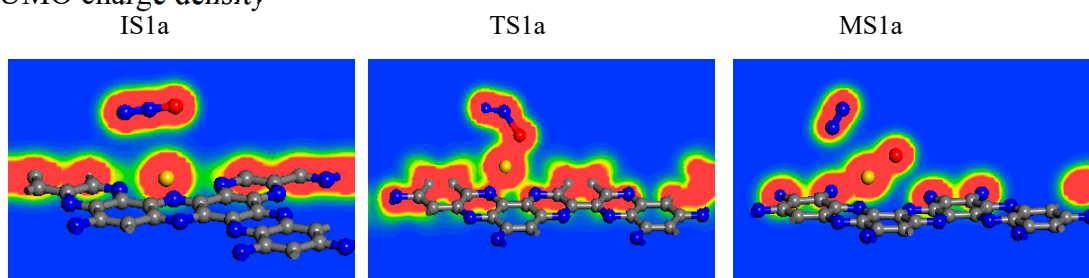

**Figure S5.** The HOMO and LUMO charge density plots for IS1a, TS1a and MS1a on **Au/C<sub>2</sub>N**.

## HOMO charge density

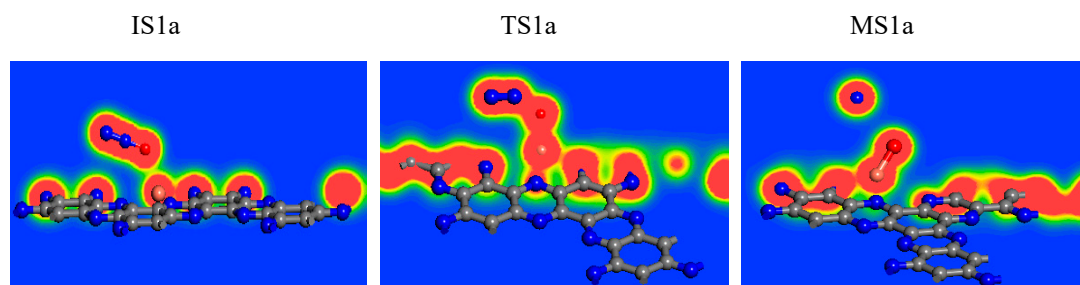

## LUMO charge density

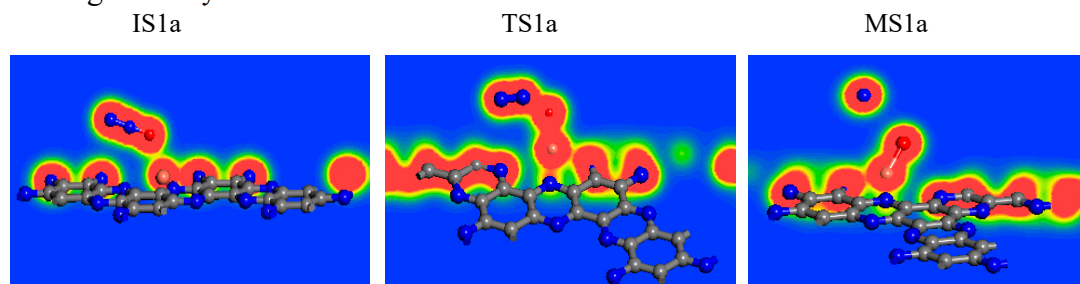

**Figure S6.** The HOMO and LUMO charge density plots for IS1a, TS1a and MS1a on **Cu/C<sub>2</sub>N**.

**Table S1.** The Mulliken charge of species involved in N<sub>2</sub>O reduction mechanism II.

| Cat                 | Atom/<br>molecule   | charges of the systems/e |        |        |        |        |
|---------------------|---------------------|--------------------------|--------|--------|--------|--------|
|                     |                     | Isolated<br>systems      | IS1b   | MS1b   | TS1b   | MS2b   |
| Au/C <sub>2</sub> N | Au                  | 0.548                    | 0.532  | 0.528  | 0.545  | 0.565  |
|                     | C                   | 0.08                     | 0.121  | 0.126  | 0.131  | 0.534  |
|                     | O(CO)               | -0.08                    | -0.075 | -0.076 | -0.081 | -0.267 |
|                     | O(N <sub>2</sub> O) | -0.278                   |        | -0.284 | -0.287 | -0.263 |
|                     | N(a)                | 0.420                    |        | 0.426  | 0.333  | 0.007  |
|                     | N(b)                | -0.143                   |        | -0.138 | -0.109 | -0.006 |
| Cu/C <sub>2</sub> N | Cu                  | 0.622                    | 0.576  | 0.576  | 0.623  | 0.688  |
|                     | C                   | 0.08                     | 0.154  | 0.154  | 0.156  | 0.532  |
|                     | O(CO)               | -0.08                    | -0.101 | -0.100 | -0.133 | -0.237 |
|                     | O(N <sub>2</sub> O) | -0.278                   |        | -0.290 | -0.271 | -0.257 |
|                     | N(a)                | 0.420                    |        | 0.422  | 0.235  | -0.001 |
|                     | N(b)                | -0.143                   |        | -0.131 | -0.098 | 0.002  |
